# Supplementary material for: M. leprae components induce nerve damage by complement activation: identification of lipoarabinomannan as the dominant complement activator
Source: PubMed Central journal article supplement (PMC4405335; doi:10.1007/s00401-015-1404-5), 2015-03-15

***M. leprae* components induce nerve damage by complement activation: Identification of lipoarabinomanan as the dominant complement activator**, Acta Neuropathologica, Nawal Bahia El Idrissi , Pranab K. Das , Kees Fluiter , Patricia S. Rosa, Jeroen Vreijling, Dirk Troost , B. Paul Morgan , Frank Baas and Valeria Ramaglia ; Corresponding author Prof. Frank Baas, email: f.baas@amc.nl.

**Fig S1.**

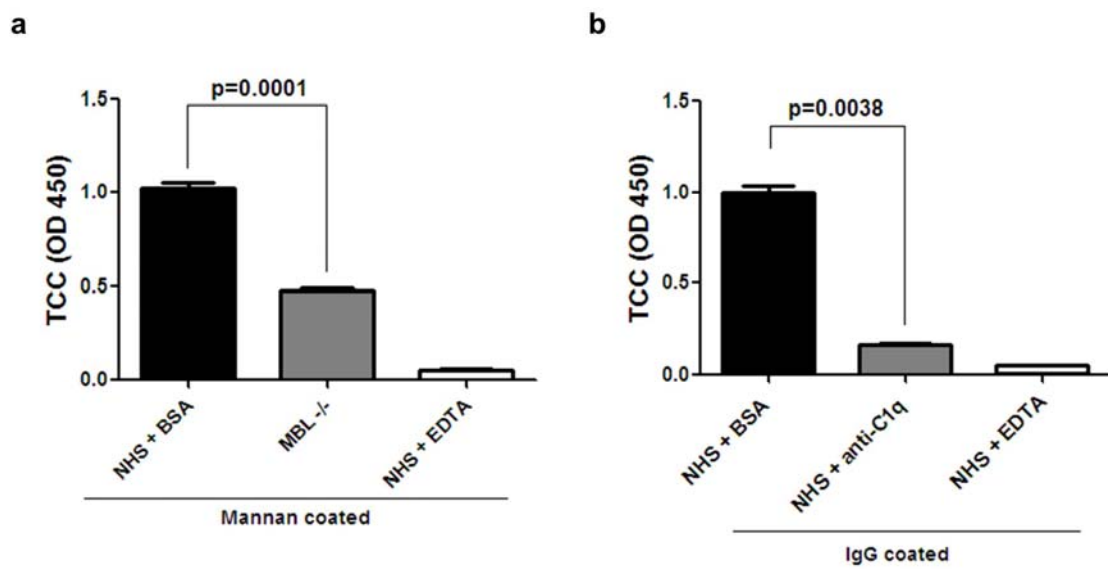

Fig S2.

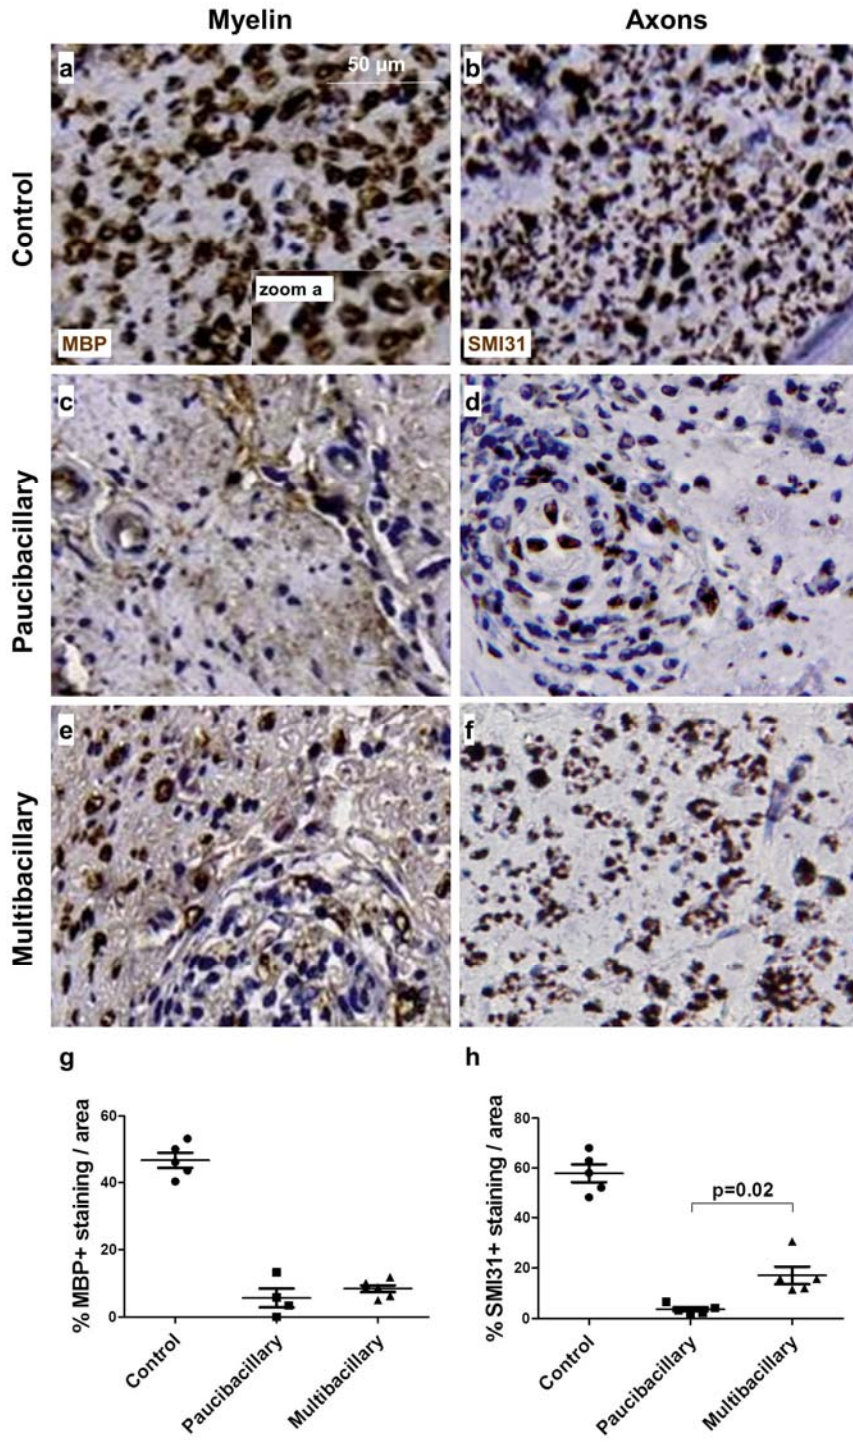

Fig S3.

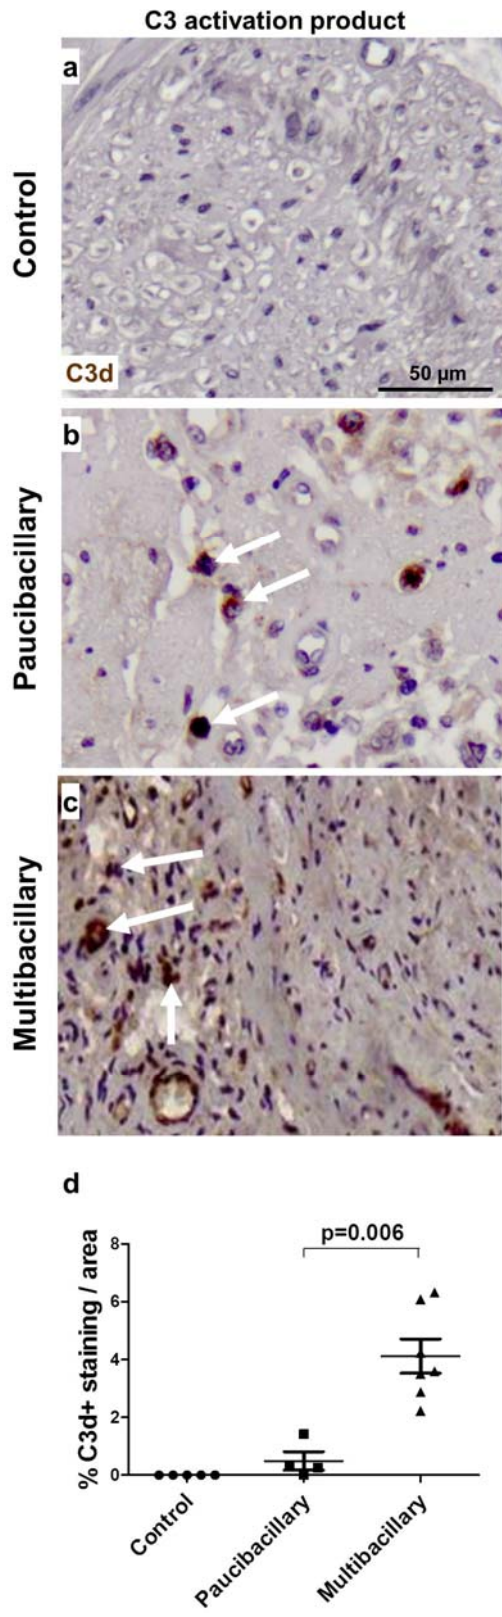

Fig S4.

a

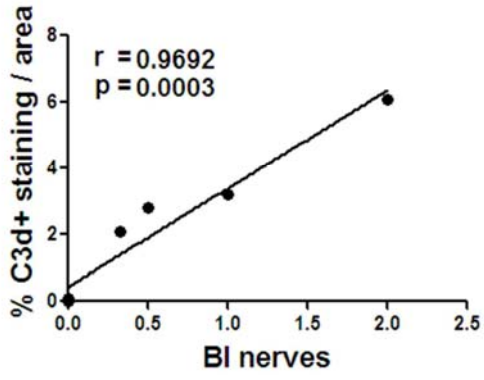

b

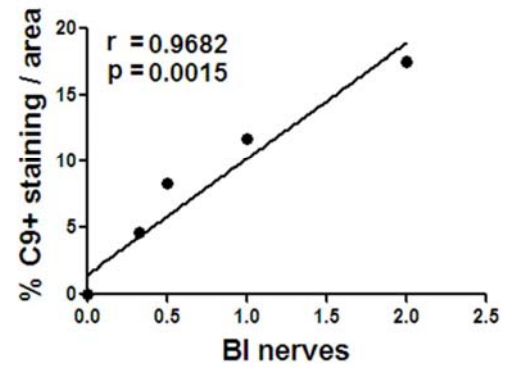

Supplement: 401_2015_1404_MOESM2_ESM.pdf [file 401_2015_1404_MOESM2_ESM.pdf]
